# Supplementary material
Source: PubMed Central journal article supplement (PMC4275889)
Supplement: rstb20130382supp1.pdf [file rstb20130382supp1.pdf]

## Electronic Supplementary Material

### PLANT TAXA DATABASE

**Table S1.**

Sub-set of the Arctic database from Sønstebo *et al.* [42] and other boreal plant species currently occurring at the sites of this study.

| <b>Family</b>     | <b>Genus</b>          | <b>Species</b>            | <b>GenBank ID</b> |
|-------------------|-----------------------|---------------------------|-------------------|
| Ptilidiaceae      | <i>Ptilidium</i>      | <i>P. ciliare</i>         | AY007634.1        |
| Anastrophyllaceae | <i>Gymnocolea</i>     | <i>G. inflata</i>         | GQ220785.1        |
| Anastrophyllaceae | <i>Barbilophozia</i>  | <i>B. lycopodioides</i>   | HQ897120.1        |
| Calypogeiaceae    | <i>Calypogeia</i>     | <i>C. cf. sphagnicola</i> | Q658801.1         |
| Cephaloziaceae    | <i>Cephalozia</i>     | <i>C. leucantha</i>       | JX629968.1        |
| Cephaloziaceae    | <i>Cladopodiella</i>  | <i>C. fluitans</i>        | JX630012.1        |
| Cephaloziaceae    | <i>Odontoschisma</i>  | <i>O. elongatum</i>       | JX630004.1        |
|                   |                       | <i>L. ventricosa</i> var. |                   |
| Scapaniaceae      | <i>Lophozia</i>       | <i>longiflora</i>         | DQ875066.1        |
| Cephaloziineae    | <i>Anastrophyllum</i> | <i>A. minutum</i>         | AY453788.1        |
| Aneuraceae        | <i>Aneura</i>         | <i>A. pinguis</i>         | DQ272350.1        |
| Dicranaceae       | <i>Dicranella</i>     | <i>D. cerviculata</i>     | AF129597.1        |
| Dicranaceae       | <i>Dicranum</i>       | <i>D. scoparium</i>       | GQ428044.1        |
| Ditrichaceae      | <i>Ceratodon</i>      | <i>C. purpureus</i>       | AF435310.1        |
| Amblystegiaceae   | <i>Calliergon</i>     | <i>C. cordifolium</i>     | AY857569.1        |
| Amblystegiaceae   | <i>Campylium</i>      | <i>C. stellatum</i>       | AY663358.1        |
| Aulacomniaceae    | <i>Aulacomnium</i>    | <i>A. turgidum</i>        | FJ628064.1        |
| Mniaceae          | <i>Cinclidium</i>     | <i>C. stygium</i>         | AF023763.1        |
| Polytrichaceae    | <i>Polytrichum</i>    | <i>P. commune</i>         | AF478317.1        |
|                   |                       | <i>P. juniperinum</i>     | AF257784.1        |
| Sphagnaceae       | <i>Sphagnum</i>       | <i>S. annulatum</i>       | AY298008.1        |
|                   |                       | <i>S. fuscum</i>          | AY361542.1        |
|                   |                       | <i>P. strictum</i>        | GU569758.1        |
| Lycopodiaceae     | <i>Lycopodium</i>     | <i>L. clavatum</i>        | GQ245106          |
| Huperziaceae      | <i>Huperzia</i>       | <i>H. selago</i>          | AJ224592.1        |
| Equisetaceae      | <i>Equisetum</i>      | <i>E. arvense</i>         | GQ428069.1        |
|                   |                       | <i>E. fluviatile</i>      | GQ244922.1        |

|                 |                    |                         |            |
|-----------------|--------------------|-------------------------|------------|
|                 |                    | <i>E. sylvaticum</i>    | GQ244928.1 |
| Pinaceae        | <i>Pinus</i>       | <i>P. sylvestris</i>    | GQ245260   |
|                 | <i>Picea</i>       | <i>P. abies</i>         | HF937082.1 |
| Cupressaceae    | <i>Juniperus</i>   | <i>J. communis</i>      | GQ245048   |
| Salicaceae      | <i>Salix</i>       | <i>S. reticulata</i>    | GQ245459   |
|                 |                    | <i>S. glauca</i>        | GQ245435   |
|                 | <i>Populus</i>     | <i>P. tremula</i>       | GQ245293   |
| Betulaceae      | <i>Betula</i>      | <i>B. pubescens</i>     | GQ244641   |
|                 |                    | <i>B. nana</i>          | GQ244639   |
|                 | <i>Alnus</i>       | <i>A. incana</i>        | GQ244547   |
|                 |                    | <i>A. viridis</i>       | GQ244548   |
| Ulmaceae        | <i>Ulmus</i>       | <i>U. glabra</i>        | AF327601   |
| Urticaceae      | <i>Urtica</i>      | <i>U. dioica</i>        | GQ245633   |
| Polygonaceae    | <i>Rumex</i>       | <i>R. acetosa</i>       | GQ245410   |
|                 |                    | <i>R. acetosella</i>    | GQ245412   |
|                 |                    | <i>R. graminifolius</i> | GQ245416   |
| Chenopodiaceae  | <i>Chenopodium</i> | <i>C. capitatum</i>     | GQ244789   |
|                 | <i>Corispermum</i> | <i>C. ochotense</i>     | GQ244821   |
| Portulacaceae   | <i>Montia</i>      | <i>M. fontana</i>       | GQ245138   |
| Caryophyllaceae | <i>Arenaria</i>    | <i>A. pseudofrigida</i> | GQ244599   |
|                 | <i>Moehringia</i>  | <i>M. lateriflora</i>   | GQ245135   |
|                 | <i>Minuartia</i>   | <i>M. stricta</i>       | GQ245131   |
|                 |                    | <i>M. rubella</i>       | GQ245130   |
|                 |                    | <i>M. biflora</i>       | GQ245118   |
|                 | <i>Stellaria</i>   | <i>S. longipes</i>      | GQ245568   |
|                 |                    | <i>S. graminea</i>      | AY521298   |
|                 | <i>Cerastium</i>   | <i>C. cerastoides</i>   | GQ244776   |
|                 | <i>Silene</i>      | <i>S. acaulis</i>       | DQ860626.1 |
| Nymphaeaceae    | <i>Nuphar</i>      | <i>N. pumila</i>        | GQ245150   |
|                 |                    | <i>N. lutea</i>         | AY145330   |
|                 | <i>Nymphaea</i>    | <i>N. tetragona</i>     | GQ245151   |
| Ranunculaceae   | <i>Ranunculus</i>  | <i>R. acris</i>         | GQ245366   |
|                 |                    | <i>R. nivalis</i>       | GQ245375   |
|                 |                    | <i>R. sulphureus</i>    | GQ245386   |
|                 |                    | <i>R. pygmaeus</i>      | GQ245378   |
|                 |                    | <i>R. hyperboreus</i>   | GQ245372   |
|                 | <i>Beckwithia</i>  | <i>B. glacialis</i>     | GQ244636   |
|                 | <i>Caltha</i>      | <i>C. palustris</i>     | GQ244674   |
|                 | <i>Trollius</i>    | <i>T. europaeus</i>     | GQ245630   |
|                 | <i>Thalictrum</i>  | <i>T. alpinum</i>       | GQ245605   |
|                 | <i>Aconitum</i>    | <i>A. lycoctonum</i>    | GQ244533   |
| Papaveraceae    | <i>Papaver</i>     | <i>P. dahlianum</i>     | GQ245188   |
|                 |                    | <i>P. lapponicum</i>    | GQ245192   |
|                 |                    | <i>P. radicum</i>       | GQ245202   |
| Brassicaceae    | <i>Erysimum</i>    | <i>E. altum</i>         | GQ244958   |

|               |                    |                            |            |
|---------------|--------------------|----------------------------|------------|
|               | <i>Barbarea</i>    | <i>B. vulgaris</i>         | AF198119   |
|               | <i>Rorippa</i>     | <i>R. palustris</i>        | GQ245402   |
|               | <i>Cardamine</i>   | <i>C. bellidifolia</i>     | GQ244682   |
|               |                    | <i>C. pratensis</i>        | GQ244686   |
|               | <i>Arabis</i>      | <i>A. hirsuta</i>          | FJ188246   |
|               | <i>Turritis</i>    | <i>T. glabra</i>           | DQ406794   |
|               | <i>Draba</i>       | <i>D. alpina</i>           | GQ244848   |
|               |                    | <i>D. norvegica</i>        | GQ244871   |
|               |                    | <i>D. lactea</i>           | GQ244864   |
|               | <i>Capsella</i>    | <i>C. bursa-pastoris</i>   | AY236218   |
|               | <i>Arabidopsis</i> | <i>A. arenosa</i>          | FJ477690.1 |
|               |                    | <i>A. lyratasubsp.</i>     | DQ406773.1 |
|               |                    | <i>petraea</i>             |            |
|               | <i>Brassica</i>    | <i>B. montana</i>          | GQ268041   |
|               |                    | <i>B. oleracea</i>         | GQ268028.1 |
|               | <i>Subularia</i>   | <i>S. aquatica</i>         | GQ245575   |
| Saxifragaceae | <i>Saxifraga</i>   | <i>S. oppositifolia</i>    | GQ245503   |
|               |                    | <i>S. nivalis</i>          | DQ860622   |
|               |                    | <i>S. cespitosa</i>        | GQ245486   |
|               |                    | <i>S. rivularis</i>        | GQ245512   |
|               |                    | <i>S. cernua</i>           | GQ245484   |
|               |                    | <i>S. hirculus</i>         | EU326096   |
|               | <i>Micranthes</i>  | <i>M. foliolosa</i>        | GQ245492   |
| Rosaceae      | <i>Sorbus</i>      | <i>S. aucuparia</i>        | GQ245554   |
|               | <i>Rubus</i>       | <i>R. chamaemorus</i>      | GQ245405   |
|               | <i>Geum</i>        | <i>G. rivale</i>           | GQ245014   |
|               | <i>Alchemilla</i>  | <i>A. alpina</i>           | GQ244543   |
|               | <i>Potentilla</i>  | <i>P. nivea</i>            | GQ245325   |
|               | <i>Filipendula</i> | <i>F. ulmaria</i>          | GQ244985   |
|               | <i>Dryas</i>       | <i>D. octopetala</i>       | GQ244887   |
| Fabaceae      | <i>Trifolium</i>   | <i>T. repens</i>           | DQ311961.  |
|               | <i>Lotus</i>       | <i>L. corniculatus</i>     | DQ311699   |
|               | <i>Astragalus</i>  | <i>A. alpinus</i>          | GQ244621   |
|               | <i>Vicia</i>       | <i>V. cracca</i>           | GQ245657   |
|               | <i>Lathyrus</i>    | <i>L. palustris</i>        | GQ245068   |
| Violaceae     | <i>Viola</i>       | <i>V. biflora</i>          | GQ245658   |
| Onagraceae    | <i>Epilobium</i>   | <i>E. hornemannii</i>      | GQ244915   |
|               |                    | <i>E. lactiflorum</i>      | GQ244917   |
|               |                    | <i>E. alsinifolium</i>     | GQ244910   |
|               |                    | <i>E. anagallidifolium</i> | GQ244912   |
|               |                    | <i>E. davuricum</i>        | GQ244914   |
|               |                    | <i>E. palustre</i>         | GQ244919   |
| Hippuridaceae | <i>Hippuris</i>    | <i>H. vulgaris</i>         | GQ245027   |
| Apiaceae      | <i>Angelica</i>    | <i>A. sylvestris</i>       | GQ244572   |

|                  |                     |                           |            |
|------------------|---------------------|---------------------------|------------|
|                  | <i>Heracleum</i>    | <i>H. sphondylium</i>     | HQ323927   |
| Pyrolaceae       | <i>Pyrola</i>       | <i>P. minor</i>           | GQ245364   |
|                  | <i>Orthilia</i>     | <i>O. secunda</i>         | GQ245155   |
|                  | <i>Moneses</i>      | <i>M. uniflora</i>        | GQ245136   |
| Ericaceae        | <i>Oxycoccus</i>    | <i>O. microcarpum</i>     | GQ245157   |
|                  | <i>Vaccinium</i>    | <i>V. uliginosum</i>      | GQ245639   |
|                  |                     | <i>V. vitis-idaea</i>     | GQ245640   |
|                  |                     | <i>V. myrtillus</i>       | GQ245637   |
|                  | <i>Phyllodoce</i>   | <i>P. caerulea</i>        | GQ245249   |
|                  | <i>Rhododendron</i> | <i>R. lapponicum</i>      | GQ245396   |
|                  | <i>Calluna</i>      | <i>C. vulgaris</i>        | GQ244671   |
|                  | <i>Andromeda</i>    | <i>A. polifolia</i>       | DQ860515.1 |
|                  | <i>Chamaedaphne</i> | <i>C. calyculata</i>      | GQ244784.1 |
|                  | <i>Ledum</i>        | <i>L. palustre</i>        | AF394252.1 |
| Empetraceae      | <i>Empetrum</i>     | <i>E. nigrum</i>          | DQ860557   |
| Primulaceae      | <i>Primula</i>      | <i>P. stricta</i>         | GQ245347   |
|                  | <i>Androsace</i>    | <i>A. septentrionalis</i> | GQ244557   |
|                  | <i>Trientalis</i>   | <i>T. europaea</i>        | GQ245620   |
|                  | <i>Lysimachia</i>   | <i>L. thyrsoiflora</i>    | GQ245107   |
| Gentianaceae     | <i>Gentiana</i>     | <i>G. nivalis</i>         | GQ244997   |
|                  | <i>Gentianella</i>  | <i>G. amarella</i>        | GQ245001   |
|                  |                     | <i>G. aurea</i>           | GQ245003   |
| Menyanthaceae    | <i>Menyanthes</i>   | <i>M. trifoliata</i>      | GQ245111   |
| Rubiaceae        | <i>Galium</i>       | <i>G. boreale</i>         | GQ244988   |
|                  |                     | <i>G. palustre</i>        | GQ244989   |
| Polemoniaceae    | <i>Polemonium</i>   | <i>P. boreale</i>         | GQ245286   |
| Callitrichaceae  | <i>Callitriche</i>  | <i>C. palustris</i>       | GQ244670   |
| Scrophulariaceae | <i>Veronica</i>     | <i>V. alpina</i>          | GQ245650   |
|                  | <i>Rhinanthus</i>   | <i>R. minor</i>           | GQ245389   |
|                  | <i>Pedicularis</i>  | <i>P. hirsuta</i>         | GQ245223   |
| Lentibulariaceae | <i>Pinguicula</i>   | <i>P. vulgaris</i>        | GQ245258   |
|                  | <i>Utricularia</i>  | <i>U. minor</i>           | GQ245634   |
| Orobanchaceae    | <i>Melampyrum</i>   | <i>M. pratense</i>        | GQ245109.1 |
|                  | <i>Bartsia</i>      | <i>B. alpina</i>          | GQ244633.1 |
| Solanaceae       | <i>Solanum</i>      | <i>S. dulcamara</i>       | HM006840   |
| Polygonaceae     | <i>Bistorta</i>     | <i>B. vivipara</i>        | DQ860530.1 |
| Plantaginaceae   | <i>Plantago</i>     | <i>P. major</i>           | GQ245263   |
| Campanulaceae    | <i>Campanula</i>    | <i>C. uniflora</i>        | GQ244679   |
|                  |                     | <i>C. rotundifolia</i>    | GQ244677   |
| Asteraceae       | <i>Solidago</i>     | <i>S. virgaurea</i>       | GQ245552   |
|                  | <i>Erigeron</i>     | <i>E. uniflorus</i>       | GQ244942   |
|                  |                     | <i>E. humilis</i>         | GQ244935   |
|                  |                     | <i>E. borealis</i>        | GQ244932   |
|                  | <i>Omalotheca</i>   | <i>O. norvegica</i>       | GQ245153   |
|                  | <i>Antennaria</i>   | <i>A. villifera</i>       | GQ244577   |

|                  |                         |                          |            |
|------------------|-------------------------|--------------------------|------------|
|                  |                         | <i>A. alpina</i>         | GQ244573   |
|                  | <i>Tripleurospermum</i> | <i>T. maritimum</i>      | GQ245625   |
|                  | <i>Matricaria</i>       | <i>M. matricarioides</i> | U82046     |
|                  | <i>Petasites</i>        | <i>P. frigidus</i>       | GQ245241   |
|                  | <i>Arnica</i>           | <i>A. angustifolia</i>   | GQ244602   |
|                  | <i>Saussurea</i>        | <i>S. alpina</i>         | GQ245475   |
|                  | <i>Lactuca</i>          | <i>L. sibirica</i>       | GQ245062   |
|                  | <i>Taraxacum</i>        | <i>T. croceum</i>        | GQ245586   |
|                  | <i>Hieracium</i>        | <i>H. pilosella</i>      | DQ460865   |
|                  |                         | <i>H. lactucella</i>     | AY192670   |
|                  |                         | <i>H. glomeratum</i>     | DQ460867   |
| Caprifoliaceae   | <i>Linnaea</i>          | <i>L. borealis</i>       | GQ245080.1 |
| Juncaginaceae    | <i>Triglochin</i>       | <i>T. palustris</i>      | GQ245624   |
| Potamogetonaceae | <i>Potamogeton</i>      | <i>P. alpinus</i>        | GQ245297   |
|                  |                         | <i>P. perfoliatus</i>    | GQ245305   |
| Liliaceae        | <i>Polygonatum</i>      | <i>P. verticillatum</i>  | HQ323999   |
|                  | <i>Maianthemum</i>      | <i>M. bifolium</i>       | HQ323966   |
| Orchidaceae      | <i>Listera</i>          | <i>L. cordata</i>        | GQ245083   |
|                  | <i>Coeloglossum</i>     | <i>C. viride</i>         | GQ244814   |
| Juncaceae        | <i>Juncus</i>           | <i>J. arcticus</i>       | DQ860563   |
|                  | <i>Luzula</i>           | <i>L. sylvatica</i>      | HQ323965   |
| Cyperaceae       | <i>Eriophorum</i>       | <i>E. vaginatum</i>      | GQ244951   |
|                  |                         | <i>E. scheuchzeri</i>    | GQ244949   |
|                  |                         | <i>E. russeolum</i>      | GQ244948   |
|                  | <i>Eleocharis</i>       | <i>E. quinqueflora</i>   | GQ244896   |
|                  |                         | <i>E. acicularis</i>     | GQ244892   |
|                  | <i>Kobresia</i>         | <i>K. myosuroides</i>    | GQ245953   |
|                  | <i>Trichophorum</i>     | <i>T. alpinum</i>        | GQ245617.1 |
|                  | <i>Carex</i>            | <i>C. parallela</i>      | GQ244736   |
|                  |                         | <i>C. lapponica</i>      | GQ244714   |
|                  |                         | <i>C. saxatilis</i>      | GQ244746   |
|                  |                         | <i>C. norvegica</i>      | GQ244733   |
|                  |                         | <i>C. rariflora</i>      | GQ244741   |
| Poaceae          | <i>Festuca</i>          | <i>F. ovina</i>          | GQ244981   |
|                  |                         | <i>F. rubra</i>          | GQ244979   |
|                  | <i>Lolium</i>           | <i>L. perenne</i>        | AY177341   |
|                  | <i>Poa</i>              | <i>P. annua</i>          | AY177346   |
|                  |                         | <i>P. supina</i>         | EU326081   |
|                  |                         | <i>P. trivialis</i>      | AY177338   |
|                  |                         | <i>P. pratensis</i>      | GQ245279   |
|                  |                         | <i>P. alpina</i>         | DQ860583   |
|                  | <i>Arctophila</i>       | <i>A. fulva</i>          | GQ244592   |
|                  | <i>Phippsia</i>         | <i>P. algida</i>         | GQ245243   |
|                  | <i>Arctagrostis</i>     | <i>A. latifolia</i>      | GQ244588   |
|                  | <i>Elymus</i>           | <i>E. repens</i>         | DQ912406   |

|                  |                      |                         |            |
|------------------|----------------------|-------------------------|------------|
|                  |                      | <i>E. mutabilis</i>     | GQ244903   |
|                  |                      | <i>E. alaskanus</i>     | GQ244898   |
|                  | <i>Leymus</i>        | <i>L. interior</i>      | GQ245076   |
|                  |                      | <i>L. arenarius</i>     | GQ245074   |
|                  | <i>Trisetum</i>      | <i>T. spicatum</i>      | GQ245629   |
|                  | <i>Deschampsia</i>   | <i>D. flexuosa</i>      | DQ631505   |
|                  |                      | <i>D. cespitosa</i>     | GQ244835   |
|                  |                      | <i>D. alpina</i>        | GQ244831   |
|                  | <i>Vahlodea</i>      | <i>V. atropurpurea</i>  | GQ245642   |
|                  | <i>Agrostis</i>      | <i>A. vinealis</i>      | EU326034   |
|                  |                      | <i>A. capillaris</i>    | AY450948   |
|                  |                      | <i>A. stolonifera</i>   | DQ336835   |
|                  | <i>Calamagrostis</i> | <i>C. lapponica</i>     | GQ244662   |
|                  | <i>Phleum</i>        | <i>P. pratense</i>      | AY177339   |
|                  |                      | <i>P. alpinum</i>       | GQ245244   |
|                  | <i>Alopecurus</i>    | <i>A. borealis</i>      | DQ860514   |
|                  |                      | <i>A. geniculatus</i>   | DQ631499   |
|                  |                      | <i>A. aequalis</i>      | GQ244549   |
|                  | <i>Milium</i>        | <i>M. effusum</i>       | GQ245115   |
|                  | <i>Nardus</i>        | <i>N. stricta</i>       | GQ245146   |
| Typhaceae        | <i>Sparganium</i>    | <i>S. hyperboreum</i>   | GQ245557   |
|                  |                      | <i>S. angustifolium</i> | GQ245556   |
| Scheuchzeriaceae | <i>Scheuchzeria</i>  | <i>S. palustris</i>     | DQ786414.1 |
| Tofieldiaceae    | <i>Tofieldia</i>     | <i>T. pusilla</i>       | DQ860636.1 |
